# Supplementary material for: Normed dataset for novel metaphors, novel similes, literal and anomalous sentences in Chinese
Source: Front Psychol. 2022 Sep 1;13:922722. doi: 10.3389/fpsyg.2022.922722 (PMC9477117; doi:10.3389/fpsyg.2022.922722)
Supplement: Supplementary file 3 [file Data_Sheet_3.xlsx]

## Sheet: Cloze probability_A
编号	1、性别	2、年龄	3、忧伤是	4、爱情是	5、欲望是	6、大自然是	7、技术是	8、旋律是	9、年龄是	10、雪峰是	11、长诗是	12、他的眼睛是	13、共鸣是	14、念头是	15、人民是	16、承诺是	17、作家是	18、社会是	19、生活是	20、皮肤是	21、并蒂莲是	22、海水是	23、忧愁是	24、意识形态是	25、痛苦是	26、体香是	27、她的目光是	28、友情是	29、文学是	30、天空是	31、工作是	32、这种诗人是	33、黑暗是	34、爬山虎是	35、眼泪是	36、生命是	37、懒惰是	38、时间是	39、标点符号是	40、我的书桌是	41、语言是	42、灵感是	43、女人像	44、危机像	45、日子像	46、心理学家像	47、数字像	48、有些男星像	49、图书馆像
Participant Number	1.Gender	2. Age	3. Sorrow is	4. Love is	5. Desire is	6. Nature is	7. Technology is	8. Melody is	9. Age is	10. Snowpeak is	11. Long poems are	12. His look is	13. Resonance is	14. A whim is	15. The people are	16. A commitment is	17. Writers are	18. Society is	19. Life is	20.The skin is	21.Twin lotuses are	22. Seawater is	23.Depression is	24. Ideology is	25.Agony is	26.Body fragrance is	27.Her gaze is	28. Friendship is	29. Literature is	30. The sky is	31.The work is	32. Such poets are	33. Darkness is	34.Creepers are	35. Tears are	36. Life is	37. Laziness is	38. Time is	39. Punctuation marks are	40. My desk is	41. Languages are	42.Inspiration is	43.Women are like	44. A crisis is like	45.Days are like	46.Psychologists are like	47.Figures are like	48.Some male stars are like	49. Library is like
1.CPA	女	19	心情	巧克力	人类	人生	生命	音符	生命	珠穆朗玛峰	笔记本	窗户	声音	想法	力量	回忆	村上春树	共同体	天气现象	皮肤	花	液体	水	马列主义	生活	美女的	雪	宝石	哲学	美梦	学习	李白	冰柜	动物	咸的	可贵	合理	生命	符号	道路	艺术	灵感	源泉	打击	流水	先知	谜题	帅哥	知识
2.CPA	男	19	情感	自行车	都市	母亲	苹果	音符	未来	火焰山	普希金	窗户	树叶	思想	上帝	幻想	莫言	共产党	冰块	裂纹	莲花	液体	沙滩	中心	快感	味道	太阳	金子	复兴	镜子	休息	李白	白昼	下山蛇	水滴	婴儿	习惯	流水	感叹号	亲人	俄语	广告牌	月季	炸弹	大叔	疯子	阿拉伯	肖战	逸夫
3.CPA	女	20	参考	巧克力	绿叶	生命	看看	街道	未来	凉皮	猫咪	眼珠	梦想	我来	苍天	记忆	橡胶	生活	人生	生命	信息	才华	时间	不同的东西	蝴蝶	味道	太阳	人心	想象	快乐	辛苦	父母	姐姐	动物	水珠	生活	坏事	猫咪	重量	烦恼	话语	瞬间得到的东西	花儿	旷课	能耐	肌肉	人生	女孩子	教室
4.CPA	女	19	日常	垃圾	畅想	生物	多样	多样	伪装	目标	理想	器官	多余	妄想	希望	往事	同学	大染缸	美丽	面具	是	生活	翅膀	政治	常态	牛奶	天气	快乐的事	人性	梦想	生存	天才	常态	妖怪	生命	一刻	正常	折磨	隔离	离开	屏障	瞬间	美好	日常	屎	骗子	难题	傻逼	牢笼
5.CPA	女	18	必需品	生命	美食	生活	光环	痛苦	生命	高山	生活	画	欣喜	闪电	江山	快乐	刘慈欣	残酷	生命	白色	美丽的花	饼干	花	意识	可怕的东西	鼻炎	灰色	好人	美好的东西	想象	学生	好人	静谧	石头	晶莹的雨滴	金子	悲伤	生命	手指	董香鱼	美丽的东西	闪电	花	障碍	旋律	医生	一位数	猴子	房子
6.CPA	男	20	钢笔	钢笔	钢笔	钢笔	钢笔	钢笔	钢笔	钢笔	钢笔	钢笔	钢笔	钢笔	钢笔	钢笔	钢笔	钢笔	钢笔	钢笔	钢笔	钢笔	钢笔	圆珠笔	钢笔	铅笔	钢笔	圆珠笔	铅笔	钢笔	钢笔	钢笔	铅笔	钢笔	铅笔	圆珠笔	铅笔	钢笔	钢笔	钢笔	钢笔	钢笔	钢笔	钢笔	钢笔	钢笔	钢笔	铅笔	钢笔
7.CPA	女	19	魔鬼	垃圾	魔鬼	宝藏	阳光	芭蕾	未知	山	作家	窗户	希望	魔鬼	希望	魔鬼	宝藏	人	风景	鸡蛋	莲花	盐	水	未知的东西	魔鬼	花朵	窗纱	文化	语文	镜子	魔鬼	牛人	黎明	壁虎	珍珠	宝藏	大忌	流水	逗号	白酒	桥梁	珍宝	宝藏	魔鬼	流沙	魔鬼	仇人	女人	房子
8.CPA	女	19	回忆	魔鬼	人性	天使	阳光	天使	老人	山脉	作品	器官	天使	思想	天使	诗歌	天使	魔鬼	天使	天使	女人	明镜	魔鬼	物体	魔鬼	天使	天使	天使	作品	镜子	律师	李白	魔鬼	植物	水晶	天使	魔鬼	金钱	逗号	天使	天使	天使	天使	魔鬼	流水	天使	字母	天使	楼房
9.CPA	男	20	琴	问题	罪	造物	手机	心情	限制	骆驼	李白	窗户	难得	想法	民义	痛苦	阿西莫夫	熔炉	痛苦	寄生虫	玫瑰	咸饼干	画	上层建筑	针	香的东西	水	女人	书	大海	爱人	天神	遐想	壁虎	痛苦	珍贵	懒惰	人造	逗号	鳄鱼	舌头	灯	水	乌云	流水	占星师	符号	鬼	坟墓
10.CPA	女	19	深夜	期待	上进	母亲	能源	故事	生长	山脉	故事	窗户	语言	想法	支撑	宝藏	讲故事的人	形态	气象	肌肉	花	蓝色	运动	思想	经历	气味	气象	刻板印象	思想	蓝色拱顶	痛苦	画家	小房子	昆虫	悲伤	旅程	魔鬼	长河	间隔	陪伴	桥梁	创意	水	泥泞	流水	智者	排列	演员	海洋
11.CPA	女	19	常态	坟墓	真事	母亲	科技	音乐	秘密	山顶	文学	窗户	认同	坏事	主人	宝贝	莫言	大染缸	晚霞	保护	祥瑞	大海	水波	政治	不可避免的东西	天生	水汽	迂腐	精神养分	气球	任务	艺术家	永恒	植物	珍珠	无价	恶魔	生命	句号	伴侣	交流	生命	女王	漩涡	无聊的生命	智者	密码	女人	自习室
12.CPA	女	20	蓝色	秋天	可怕的东西	令人向往的未来	高超	悲伤	未来	高山	优美的诗篇	窗户	天使	遐想	团结	美好岁月	想象力	光明	美丽的事物	褶皱	美	生活	大	难以磨灭的记忆	深渊	不存在的东西	朦胧	低微的事	一首歌	大碗	简单	画家	噩梦	顽强	珍珠	珍贵	悲哀	流水	生活	善良	交流工具	一束光	水	黑洞	白驹过隙	灯	小人	老虎	海洋
13.CPA	女	19	无奈	毒药	毒药	未知的东西	发展	快乐	伤感的事物	白色的东西	画	天气	梦想	胡思乱想	力量	长情	写作	变化	多样	脆弱	花	生活	干净	物质基础	致命的东西	虚无	迷茫	勤劳	美好的事物	锅盖	必须的东西	画家	深渊	绿色	痛苦	珍贵的东西	人性	水	断句	珍贵	魅力	瞬间	水	野兽	流水	洞察者	蝌蚪	普通人	知识的海洋
14.CPA	女	28	蓝色	春天	可怕的	奇妙的事物	生产力	生命	界限	高山	音乐	心灵的窗口	感同身受	想法	伙伴	快乐时光	幻想家	残酷	漂亮的人	鸡蛋壳	花	人生	天空	思想	暂时的事物	独特的事物	颗粒物	保守	艺术	穹庐	喜欢的事物	远方	光明	益虫	珍珠	强大的事物	违禁品	生活	句号	好朋友	奇妙的	实践	战斗者	泡沫	烟花一样灿烂	武器	饼干	傻子	仓库
15.CPA	女	20	蓝色	调味品	渴求	奇妙	创新	音符	年纪	山峰	漫长	星星	共情	想法	公民	胶片	作者	复杂	美丽	屏障	莲花	咸水	波涛	形态	麻痹自我	好闻	天气	禁锢	艺术	水墨画	奋斗	作家	黎明前夕	动物	泪水	舞台	可怕	有限	符号	陪伴	交流	迸发	水	黑天鹅	齿轮	医生	符号	星星	知识库
16.CPA	女	18	眼泪	爱情	魔鬼	大自然	科技	美好	生活	山	诗	眼睛	共鸣	年头	江山	假话	作家	社会	美好的东西	嫩	花	盐	伤心	方向	垃圾	香	目光	船	文学	希望	搬砖	李白	黑暗	虫	珍珠	最重要的东西	魔鬼	海绵里的水	句号	幻想	话	缪斯	水	不妙的事	日子	人	数字	男人	监狱
17.CPA	女	18	眼泪	四月天	鬼	母亲	传统	生活	美好的事	高的	爱	星星	知音	闪电	未来	金子	鲁迅	复杂	自己的事	水果	爱	咸水	幸福	旗帜	疤	香料	温暖	财富	精华	蔚蓝色太空	生活	李白	光	山脉	真诚	可贵的东西	鬼	速度	问号	美梦	大家	火	小公主	空气	诗	蛔虫	符号	杀马特	摆设
18.CPA	女	19	痛苦	毒药	罪恶之源	生机	手段	歌	幸福	山	诗	光	认知	毒	希望	虚伪	老舍	黑暗	一地鸡毛	黄色的东西	花	咸味的东西	痛苦	思想	暂时的需要	香水	闪亮	药	诗	未来	老师	李白	社会	草	希望	长河	毒药	河	句号	木头	桥	源泉	疯子	蛇	太阳	引导者	数字	王源	百宝箱
19.CPA	女	18	痛苦	不可信的东西	欲望	新鲜	木匠	音符	时间	珠穆朗玛	强烈的感情	无辜	高山流水	念头	我们	财富	鲁迅	险恶	柴米油盐	嫩白的事	罕见的东西	咸的糕点	悲伤	意识	病痛	香水	刀子	友谊	宝典	天空	劳累的东西	诗人	邪恶	坚强	珍珠	小草的芽	拖拉机	时光	逗号	时光	中文	灯泡	水	大风	流水	小偷	小数	蔡徐坤	安静
20.CPA	女	18	中药	美好	深渊	美丽	工具	音符	树轮	白色	难搞	宝石	神奇	想法	蚂蚁	玻璃	工作	大染缸	刮刮乐	斑点	双胞胎	浪漫	难过的事	抽象	生姜	香水	阳光	宝藏	神秘	画	谋生工具	李白	水墨画	小动物	珍珠	珍宝	癌症	小偷	符号	木头	工具	瞬间	妈妈	杀手	日记本	镜子	小棍棍	帅哥	阶梯
21.CPA	女	19	丁香花	甜蜜的	巨大的东西	神奇的事物	难懂的道理	旋律	秘密	白色的东西	诗歌	星星	共同的想法	可怕的想法	靠山	千金	厉害的人	孤独	白开水	黄皮肤	不认识	心情	丁香花	信仰	无形的东西	香的东西	感情	小船	学科	玻璃	老师	凡人	宇宙	美女	水滴	长河	蛔虫	八点	逗号	木头	难学的语言	奇妙的东西	水	恶魔	流水	放大镜	三	帅哥	饭店
22.CPA	女	18	蓝色	粉色	蛇	草地	过硬	优美	白发	尖头	草地	琥珀色	脑电波	想法	当家做主	坚定	海伦凯勒	复杂	多姿多彩	黄色	荷花	咸水	苦涩	党	折磨	香气	爱意	桥梁	知识	蓝色	繁杂	李白	人影	绿色	咸水	绿色	虫子	水	关键	木头	交通工具	流星	水	世界末日	流水	窥探者	曲线	弱智	面包
23.CPA	女	20	一首诗	一碗粥	魔鬼	母亲	基础	曲调	树轮	顶峰	抒发情感的诗	狗眼	共同的情感	幻想	英雄	磐石	韩寒	染缸	一本书	屏障	两朵花	盐	人生	马克思主义	伤痛	玫瑰花香	冰山	一团火	一种情怀	世界	教书	李白	地狱	一种植物	悲伤	奇迹	毒药	小偷	逗号	木桌子	桥梁	源泉	天使	蛇	小偷	窥探心里的人	审判	娘炮	一座宝库
24.CPA	女	20	落叶	幻想	金钱	老子	财富	物流	秘密	航空	无聊	汉堡	归宿	信念	江山	直男	投资	指南	树根	屏障	姐妹	盐水	思念	年级	认真	天生	世界	糖果	文字	自由	承诺	天才	孤单	名句	哭泣	宇宙	闺女	试卷	文章	数字	英语	天王	公主	泥潭	服务	变态	沙滩	小生	师范
25.CPA	女	17	下雨	美好	短暂	树林	铁制品	美好	太阳	雪	画	蓝色	思想碰撞	理想	基石	她	心灵	个人孤独	坎坷	细胞	并蒂莲	盐	丁香花	思想	流星	香	暖风	坚贞不催的东西	心灵涤荡	蓝天	白领	隐居者	孤独	植物	水	短暂	颓废	跑	句号	栖息地	交流方式	喷泉	水	生化危机	温馨	读心术者	数字	奋斗男孩	天堂
26.CPA	女	18	蓝色	难得的	正常的	野性动物的集合体	人工智能	旋律	头发	啤酒	读不懂的短句子	蓝色	回声	贤者时间	国家	白纸黑字	王朔	大树林	人生	保护膜	马蹄	空气	女人	混合物	汉人	化妆品	水	美梦	必不可少的东西	海洋	职业	骗子	萤火虫	壁虎的家	咸水	冻裂的水管	本能	虚无	语言的沉默	我性格的体现	交流工具	彩虹	同性恋	潮汐	美梦	算命的	麻线	娘娘腔	仓库
27.CPA	女	18	难过	鹤顶红	贪念	树林	手段	曲调	花甲	高山	诗文	窗户	共情	想法	主人	誓言	文人	深渊	利器	器官	荷花	咸水	乡愁	思想	甘草片	花香	安抚	糖块	艺术	家乡	职业	豪放派	杀手	小动物	水滴	宝玉	毛病	流水	逗号	板子	介质	启发	花朵	轮子	蜂蜜	伟人	动物	哥哥	海洋
28.CPA	女	19	调料品	选择	扩张	宝藏	捷径	基调	枷锁	昵称	思绪	红宝石	机遇	新世界	劳动力	契约	艺术家	齿轮	戏剧	器官	秀女	归宿	情绪	社会导向	养料	特质	暖流	财富	纪录片	画板	义务	天才	虚无	动物	珍珠	金	品质	沙子	注解	日记本	工具	流水	花朵	考验	指针	放大镜	符号	井底之蛙	天堂
29.CPA	女	19	心情	禁果	恶魔	系统	本领	节奏	秘密	山	难题	星星	认可	未来	支柱	泡沫	男生	家	打结的麻绳	器官	莲花	名词	心情	基础	心理状态	身体香气	火炬	财富	学科	不可数名词	老师	天才	胆怯	植物	珍珠	长河	病	金钱	语言用具	红木	交流工具	源泉	水	信号灯	计时器	智者	符咒	丘比特	海洋
30.CPA	女	19	苦难	彩虹	本性	母亲	硬本领	平和	阅历	高山	歌曲	宝石	交流	想法	力量	力量	蜡烛	集体	快乐	外壳	同甘共苦	蓝田	绳结	共识	经历	甜味	照明灯	宝贝	学问	大海	任务	李白	常态	藤萝	情绪	财富	习惯	流水	东西	木头	文化	源泉	孔雀	灾难	诗歌	母亲	符号	硬汉	宝库
31.CPA	女	20	必需品	两个人的战争	深渊	馈赠	第一生产力	音符	生命	老师	交响乐	宝石	胸腔振动	星星	主体	空中楼阁	斗士	复杂	一团糟	黄色	奇观	盐	苦恼	严肃	必需品	牛奶	温柔的光	安慰剂	安慰剂	画布	狗屎	不务正业	安静	植物	珍珠	永恒	死因	流水	逗号	乱	纽带	暴风雨	金星	蛇	流水	医生	时间	傻子	医院
32.CPA	女	19	眼泪	难得	刀	绿色的	学习的	音乐	快乐	雪山	河	刀子	音乐	活着	未来	无价之宝	写作	和谐的事物	演戏	白色	不知道	力量	酒精	共产主义	巨变	未来	温柔的风	无价	艺术	画	家庭	李白	白天	植物	珍珠	无价的东西	剑	海绵里的水	小点	木质	艺术	灯泡	花	炸弹	海洋	科学家	符号	帅哥	知识库
33.CPA	女	18	感情	坟墓	想法	母亲	能力	音乐	未知	白色穹顶	噩梦	宝石	共同想法	想法	根基	金	人	复杂	人生	组织	植物	水	烦恼	哲学	面具	香味	温润	空气	浪漫	希望	生活	浪漫	晚上	动物	水	河流	毛病	金钱	蝌蚪	木桌	工具	发现	水	危险	流水	侦探	符号	恶魔	宝藏
34.CPA	女	20	海洋	相濡以沫	双刃剑	生态	兴国利器	美妙的	成长	山峰	咏叹	窗户	理解	水龙头	中心	金	文艺创作者	网	网	人体器官	植物	咸的东西	乱麻	思想	苦海	美梦	忧伤	金石	艺术	蔚蓝色	奋斗	田园派诗人	地狱	植物	珍珠	雪梅	毒药	河流	停顿	崭新的东西	交流工具	喷泉	钻石	炼狱	流水	知心人	公式	娘炮	知识海洋
35.CPA	男	19	过去	毒药	缘由	妈妈	谋生手段	音乐	未知	山峰	赞美	宝石	难得之事	思绪	英雄	千金	文人	集体	乐章	人体部分	植物	宝石	过去	思想	过去	气味	尖刀	珍宝	艺术	明镜	途径	隐士	幕布	植物	珍珠	美好	恶魔	千金	符号	木制品	工具	思绪	妈妈	警钟	流水	内心的映射	工具	娘炮	宝库
36.CPA	女	18	匕首	雨水	魔鬼	母亲	计算机	快乐	标签	困难	享受	星辰	和谐	想法	主人	一生一世	职业	染色缸	诗	屏障	花	盐水	剑	社会主义	惩罚	香水	暖烟	暖阳	生活	杯子	生活	天才	角落	植物	水晶	河	习惯	主宰	语言	角落	文化	闪电	水	机会	流水	天使	玩偶	天使	博物馆
37.CPA	女	19	苦瓜	毒药	无止境	美女	工具	音乐	标签	圣洁之物	竹子	器官	激动	方向	江河	书	疯子	聚宝盆	汤水	保护膜	好人	河流	烦恼	思想	毒药	气味	呆滞	丝带	艺术	快乐	狗血	傻子	黑幕	动物	液体	珍宝	毒药	金钱	艺术	木头	话	精灵	狐狸	掉桥	苦瓜	变态	佛	弟弟	屋子
38.CPA	女	18	黑暗	虚无	虚无	回归	技能	律动	外在	高山	无聊	明亮	回应	回家	国家	使命	韩寒	集体	柴米油盐	油痘肌	人	栖息地	伤感	多元	深渊	正常现象	亲切	无价	无感	晴朗	负担	理想	绝望	植物	无价	珍宝	锁链	宝藏	逗号	垃圾场	工具	源泉	暖床	踩空	生活	奇迹	工具	美人	老爷爷
39.CPA	女	17	海洋	奇迹	沟壑	粮仓	先进	乐章	伤痛	顶端	乐章	水晶	情感	小草	后盾	永远	文人	染缸	时间	白皙	姐妹	资源	河流	态度	大海	美妙	温暖	塑料	书籍	海水	无聊	垃圾	永恒	动物	珍珠	时间	杀手	金钱	记号	伙伴	结晶	源泉	海绵	魔鬼	流水	骗子	数学	爱豆	知识
40.CPA	女	19	忧伤	玫瑰	洪水	母亲	钥匙	音符	年轮	雪山	常识	星星	波浪	云烟	领导	金子	莫言	磨炼	磨难	屏障	配偶	盐水	雨巷	思想	毒药	蜜糖	火炬	宝石	艺术	风暴	学生	豪放派	灾难	植物	咸水	科学	万恶之源	金钱	信使	木头	桥梁	泉水	温水	陷阱	苹果	心理学家	链条	吸尘器	宝藏
41.CPA	女	19	情绪	虚无缥缈的	正当的	世界	手艺	节奏	一切	山	文字	蓝色	声音	一切	人	谎言	作家	社会	萧条	冷白皮	花	水	忧愁	社会主义	习惯	薰衣草香	太阳	友情	思想	海水	工作	诗人	生活	动物	体液	瞬间	习惯	时间	作业	书桌	工具	美梦	水	危机	不知道	诗人	高数	雕塑	宝藏
42.CPA	女	20	情感	良药	情感	鬼斧神工	生存	音乐	秘密	高山	情感	钻石	开心	思想	家庭成员	虚无	勇士	集体	画	海绵	花	盐味	流水	思想	情绪	吸引力	一把刀	船	作品	物	老师	神经病	灭绝	动物	水晶	长跑	坏习惯	年代	逗号	好地方	沟通	火花	美女	考验	流水	医生	虫	帅哥	海洋
43.CPA	女	19	顶香	棉花糖	沟壑	母亲	剪视频	音乐	人生的阶段	珠穆朗玛峰	雨巷	星星	声音	善意	主人	相信我	路遥	共产主义社会	回忆	白色	花	蓝色	风	意识	雪	玫瑰	火炬	甜点	艺术	希望	医生	害群之马	夜晚	植物	盐水	一切	害虫	生命	句号	铁	英语	雨	舞蹈家	老鼠	生活	思想透视者	图像	歌手	阶梯
44.CPA	男	18	哀愁	坟墓	邪恶	山河	奢望	音乐	等级	山峰下雪	短诗	大海	灯塔	一瞬间	群众	假的	画家	整体	痛苦	器官	花	盐	长河	垃圾	火焰	女朋友的味道	春水	糖果	艺术	大海	剥削者	黄河	明灯	东北虎	水晶	生机	你	小溪	符号	木板	学科	闪电	男人	远处的犀牛	未来	巫师	号码	女人	博物馆
45.CPA	女	18	流水	钻石	想法	母亲	生产力	音符	成长	冰激凌	星河	蓝色	共情	想法	力量	甜品	职业	整体	过日子	保护层	花	眼泪	流水	思想	磨难	香味	暖阳	甜品	字符	梦想	学习	米开朗琪罗	恐惧	植物	咸水	舞台	障碍	流水	字符	学习桌	字符	源泉	水	台风	流水账	医生	音律	吸尘器	知识殿堂
46.CPA	女	18	悲痛	糖果	魔咒	宝藏	关键	声音	代沟	雪山	句子	大海	默契	念想	家人	煎饼	人类	家庭	旅行	屏障	树叶	水源	烦闷	立场	伤心	香味	春泉	鲜花	太阳	海洋	律师	大家	黑夜	植物	珍珠	奇迹	毒药	海绵	东西	杯子	桥梁	冰块	公主	炸药	岁月	镜子	人物	女人	建筑
47.CPA	女	19	泪水	甜食	幸福	动物	好事	恶心	永远	大学	坏人	天空	神仙	害怕	沮丧	水杯	好人	手指	森林	牛奶	难受的事	沙子	故乡	思想	省力	丑事	机关枪	小船	手机	大海	讨厌的东西	人们	历史	小草	汗珠	希望	好处	生命	食物	问题	说话	山川	花朵	考验	水	神经病人	风	小狗	雨
48.CPA	女	19	阳光	灵魂契合	感性	生物圈	生活水平提升品	音乐	无用衡量	山峰	诗歌	我的爱人	爱	执念	人类	千金	人	人类集合	生存	肉质	花	栖息地	明媚	思维指导者	感情	香气	你	爱	精神食粮	大海	妥协	人	光明	动物	水	求索	常态	无穷	必需品	长方形	情感	爱	人	转机	绿叶	我的爱人	人	人	海洋
49.CPA	女	17	雨天	调剂品	牢笼	家园	根本	乐曲	生活	白纸	诗篇	葡萄	感应	想法	基础	磐石	文人	基石	旅途	白色	植物	资源	雨水	上层建筑	药物	花香	星光	岩石	动力	大海	翻译家	文人	幕布	动物	珍珠	宝石	罪过	长河	工具	木头	纽带	流星	梅花	地震	流水	灯塔	符号	坏蛋	基站
50.CPA	女	20	能量	慰藉	海	珍宝	工具	音乐	成长	山	钻石	宝石	碰撞	思想	主人	金子	名人	染缸	诗歌	屏障	花朵	波浪	毒药	思想	沙	诱惑	刀子	金子	瑰宝	自由	能力	天才	恐惧	植物	珍珠	宝物	毒药	宝石	助手	木材	工具	引导	玫瑰	炸弹	流水	导师	符号	星星	书本
51.CPA	女	18	河流	面包	喷泉	奶奶	钱	回忆	日子	冰淇淋	文字	宝石	美好	灰尘	蜜蜂	空气	普希金	鬼	蜘蛛网	鼓面	情侣	盐	蚂蚁	灵魂	拖鞋	沐浴露	太阳	小船	泰山	白布	蛇	白居易	泥土	动物	战利品	天空	魔鬼	金钱	句号	箩筐	工具	泉水	水	老虎	破烂	药	概率	小猫	大楼
52.CPA	女	19	悲伤	罗曼蒂克	爱	山	毒药	音乐	年轮	无人之境	春天	琉璃	想法	选择	基础	钢	莫言	聚居地	苟且	山峦	畸形	梦境	紫丁香	虚妄	绝望	少女	水	爱	诗	镜面	学生	梦幻	恐惧	浪漫	玻璃	蜡烛	罪恶	长河	插入句	木头	工具	想法	母亲	压迫	流水	审判者	符号	普通人	避难所
53.CPA	女	18	忧愁	喜欢	无尽	万能	专业	音符	问题	珠穆朗玛峰	诗歌	眼睛	心有灵犀	梦想	主人	金	文学	和谐	电视剧	紧绷	莲花	水	忧伤	专有名词	难过	香味	温柔	无价之宝	瑰宝	风景画	营养	浪漫	黑色	动物	水	顽强	魔鬼	珍贵	符号	桌子	工具	无穷	花	恶魔	流水	透视仪	字母	帅哥	学堂
54.CPA	女	18	眼泪	花束	苹果	母亲	电脑	音符	年轮	冰淇淋	情书	黑曜石	灵魂	思想	海浪	沙子	文人	竞赛场	希望	屏障	花	裙摆	情绪	知识	生命	气味	压力	钻石	艺术	画纸	大山	天才	房间	植物	液体	心跳	死亡	小偷	东西	木头	工具	烟花	鲜花	洪水	流水	画家	符号	禽兽	殿堂
55.CPA	女	19	海洋	欲望	爱情	花朵	牌	避难所	秘密	住所	情诗	星星	同理心	魔鬼	愚者	冲动	创造神	人类	末日	凝乳	双子	漩涡	雨巷	歌	王座	海风	鄙视	高山流水	情感	天堂	防晒员	天才	孤独	植物	珍珠	空白	白色	老板	休止符	木书桌	工具	火花	蛋糕	子弹	屎	医生	作业	戏子	宝藏屋
56.CPA	女	18	悲伤	苦水	深渊	画	力量	音符	符号	巅峰	历史	窗户	友情	大海	朋友	千金	书	染缸	调料	黄色	花朵	蓝色海洋	难过	河流	挣扎	爱	兴奋剂	绳子	来源	蔚蓝	生活	高峰	恐惧	动物	绝望	白纸	杀手	长河	分别	木板	桥梁	花束	衣服	陷阱	流水	导师	人	纸张	海洋
57.CPA	女	18	俄语	家庭	欲望	宝藏	计算机	旋律	数字	山顶	诗集	大海	和谐的朋友	想回家	重要力量	金子	人	集体	日子	人的皮肤	莲花	水	俄语	中国特色社会主义	俄语	香气	我	宝藏	书	画	老师	李白	害怕	植物	水流	时间	睡觉	无穷的河	停顿	好书桌	俄语	宝藏	老师	危机	时间	人	数字	小白脸	书籍的家
[truncated: 73 more columns]
