# Supplementary material for: Normed dataset for novel metaphors, novel similes, literal and anomalous sentences in Chinese
Source: Front Psychol. 2022 Sep 1;13:922722. doi: 10.3389/fpsyg.2022.922722 (PMC9477117; doi:10.3389/fpsyg.2022.922722)
Supplement: Supplementary file 4 [file Data_Sheet_4.xlsx]

## Sheet: Cloze probability_B
编号	1、性别	2、年龄	3、女人是	4、危机是	5、日子是	6、心理学家是	7、数字是	8、有些男星是	9、图书馆是	10、他的手指是	11、艺术家是	12、树影是	13、外科医生是	14、数据科学家是	15、文化冲突是	16、我的耳朵是	17、人类是	18、梦想是	19、学历是	20、网络暴力是	21、思想是	22、她的心肠是	23、孩子是	24、长河是	25、音乐是	26、阳光是	27、志愿者是	28、死亡是	29、同声传译员是	30、天皇是	31、沙滩是	32、道路是	33、摔跤手是	34、诡辩是	35、祖国是	36、婚外情是	37、想法是	38、山路是	39、广告牌是	40、她的问候是	41、夕阳是	42、男人是	43、基因像	44、词语像	45、反光的玻璃像	46、拖延症像	47、决心像	48、浮尘像	49、有的花像
Participant Number	1. Gender	2. Age	3. Women are	4. A crisis is	5. Days are	6. Psychologists are	7. Figures are	8. Some male stars are	9. Library is	10. His fingers are	11. An artist is	12. Tree shadows are	13. Surgeons are	14. Data scientists are	15. Cultural conflicts are	16. My ears are	17. Mankind are	18. Dreams are	19. Educational background is	20. Cyber violence is	21. Thoughts are	22. Her heart is	23. Children are	24. A long river is	25. Music is	26. The sunshine is	27. Volunteers are	28. Death is	29. Simultaneous interpreters are	30. The emperor of Japan is	31. Sandbeaches are	32. Roads are	33. Wrestlers are	34. A sophism is	35. The motherland is	36. Extramarital affairs are	37. Ideas are	38. Mountain roads are	39. Billboards are	40. Her greetings are	41. The sunset is	42. Men are	43. Genes are like	44. Words are like	45.Reflective glass is like	46.Procrastination is like	47.Resolution is like	48.Dust is like	49.Some flowers are like
1. CPB	女	21	天气	噩梦	太阳	人	符号	虚伪的人	任务	钢筋	浪漫的人	婆娑的	天使	母亲	普遍存在的现象	大耳朵	智慧	动物	未来	痛苦	智慧	面条	天使	长江	歌	上帝	阳光	解脱	人才	人	游戏天堂	瑰宝	力量	玩笑	美丽	自私行为	主导	弯的	垃圾	温柔的声音	美的	男的	编码	拼音	镜子	慢刀子	兴奋剂	细菌	图像
2. CPB	女	21	美人	危险	时间	读心人	一二	影帝	藏书阁	流水	神经质	阴影	天神	中国	生活	听力设备	动物	高级动物	幸福	活着	活跃	模特	神兽	历史	艺术	光	天使	生命终结	工作	日本	沙子	艺术	职业	器官	痛苦	无耻的东西	未来	棋盘	广告	无聊	太阳	骗子	螺旋管	单词	镜子	自杀	毅力	霾	方块
3. CPB	女	22	美女	休止符	流水	我的救星	搞不懂的东西	表里不一的人	常去的地方	枯树	我的梦想	婀娜的人	可怕的人	人才	不可避免的事情	脏耳朵	愚蠢	傻子	垃圾	刀子	希望	美丽的东西	可爱的	叹息	人生	温暖的	伟大的人	人的最终归宿	领袖	愚蠢的人	生命	方向	猪	噩梦	力量	深渊	风向标	形状	收费的东西	温暖	死亡	动物	搞不懂的东西	刀子	一面镜子	让我慢性自杀的东西	石头	蜉蝣	方块
4. CPB	女	21	人	生命	循环	救星	安眠药	心头好	宝库	春水	神仙	鬼魅	神人	中国	咖啡	耳垂	生物	万物之长	牵绊	困苦	芦苇	魔鬼	累赘	河流	良药	温暖	天使	解脱	大手	罪人	回忆	艺术	力士	命门	骗局	赢家	灵光	远方	装饰	甜蜜	玩家	动物	信件	天文	镜子	毒品	口号	人生	文字
5. CPB	男	29	鸡汤	疲劳	劳累	大仙	针头	女星	考试	希望	彩色	凉爽	账单	概念	愚蠢	声音	生命	动物	纸张	挣扎	色带	脂粉	户籍	运动	亮光	射线	投机	痛苦	西装	日本	干爽	句子	汗液	痛苦	美丽	职业	烟雾	青苔	塑料	遗忘	暖色	肌肉	彩带	珠子	温暖	幽灵	石头	疼痛	线团
6. CPB	女	21	水	祸害	水流	恩人	爱情	渣男	知识	柳条	达芬奇	斑驳的东西	天使	花园	争吵	机器猫	厉害	动物	高贵	残酷	复杂的东西	性感的	可爱的	银河	悦耳	灿烂	无私的人	终结	厉害的人	傻子	快乐	韵律美	旁系	山	慰藉	大人物	位置	思想	宣传	温柔	西下	帅哥	链子	音符	镜子	朋友	杀生丸	蜉蝣	方块
7. CPB	女	21	男人	灾害	幻象	老师	白纸	老公	纸	艺术品	怪人	妖怪	帅哥	中国	黑水	耙耳朵	鬼怪	鬼怪	虚伪	妖怪	酒精	蚊帐	石头	河	小可爱	热浪	天使	解脱	人	狗	海边	歌	肌肉	弹簧	假人	人	天空	挫折	门面	蛋糕	土	女人	豆子	指甲	太阳	阴霾	山	星星	图
8. CPB	女	22	生命	偶然	太阳	算命者	希望	梦想	知识	梦想	伟大的人	动图	人才	伟大的人	必然现象	梦想	永恒	进步	善良	坏事	未来	流行	天真的人	梦想	动听的音符	必需品	伟大的	必然的	优秀的人	存在的	回忆	古代	生活	噩梦	甜品	辛勤的园丁	未来	数字	坏事	美丽	美好的事物	安全	布袋	数字	光	没有	信心	沙子	图画
9. CPB	女	21	花	脱发	劳动	人	符号	鲜肉	建筑物	剑	珍珠	鬼怪	职业	家	站队	听觉器官	高级动物	天	保证	前提	芦苇	焦点	幼苗	意象	艺术	箭	中学生	终结	中介	象征	游乐园	文体	肌肉男	管道	良药	园丁	线团	小路	巨物	春风	红布	石头	说明书	单位	激光	毒品	磐石	精灵	画
10. CPB	男	20	白色	金融危机	房间	男人	生活	蔡徐坤	白房子	萝卜	梅兰芳	草地	白大褂	家	争吵	小耳朵	生物	男人	泡沫	食物	大脑	女生	怪兽	长江	朋友	光线	年轻人	黑暗	日语传译员	人	沙子	赠汪伦	壮汉	肉	冰	中年人	灯	泥土	可口可乐	生命	煎饼	上班族	链条	嘴唇	手电筒	烂肉	钢铁	黄雾	方块
11. CPB	女	21	水	机遇	沙子	人	循环	同性恋	建筑	畸形	人	投影	人	母亲	矛盾根源	器官	集合体	动物	泡沫	有限体	无形	人	人	黄河	信仰	温暖	人	永恒	行走的词典	人	景观	瑰宝	人	器官	花朵	人	闪光点	盘旋	木牌	白开水	红色	钢筋	螺旋体	尘埃	夜光标识	绝症	磐石	无形物	珠宝
12. CPB	女	21	妖精	问题	梦想	学者	符号	渣滓	安静之所	长条	雅士	斑驳	卓越的人	母亲	矛盾	两只	动物	动物	真理	根本	生命	职业	花朵	人生	语言	温暖	天使	正常现象	辛苦的人	日本人	金子	主导	职业	脆弱	太阳	苦味	新颖的看法	未来	大象	春风	梦想	狡猾的人	编程	音符	镜子	害虫	磐石	蜉蝣	画
13. CPB	女	19	水	灭绝	慢慢	弗洛伊德	时间	蜜桃	书的海洋	鸡爪	贝多芬	阴影	帅	对	黑白	数字	虚无	钱	本科	错	太阳	好的	你的	黄河	云野	刺眼的东西	自愿	害怕	将来	凶残	沙	弯	强壮	生活	美好	人生	某天	蜿蜒	高山	开心的事	美	混蛋	基因	虫子	镜子	坏的事物	光	尘埃	太阳
14. CPB	女	19	水	未来	书籍	教授	数字	人设	地点	生存工具	人才	花岗岩	医生	天才	常态	器官	生物	生活	大学	屠夫	核心	棉花	幼苗	历史	符号	希	超人	结果	翻译员	九五之尊	海滨	路	战士	梦	家	罪恶	灵感	路	宣传报	早安	落日	动物	电话号码	诗	镜子	噩梦	顽石	灰尘	美人
15. CPB	男	19	善变的人	讨厌的东西	生活	医生	符号	渣滓	海洋	钢铁	天才	鬼影	天才	统计学家	武器	生命	未来	希望	生命	刺刀	主导	石头	天使	生命	美好的事	温暖	天使	必然	天使	皇帝	金子	曲折的路	大象	荒谬	真理	痛苦	新颖的东西	蛇	垃圾	甜蜜	希望	强壮的人	程序	花朵	墙	毒品	能源	沙子	人
16. CPB	女	19	调色盘	暴雨	生活	心理辅导师	表示符号	害虫	老师	细棍	创造者	影子	医者	科学家	互不相容的液体	接收器	生物	期望	本科	利刃	哲人	床帘	心灵寄托	河流	微风	必需品	代表	结果	职业	日本人	外景	山湾	力量型选手	幽灵	家	脱轨火车	明灯	迷途	推销工具	祝福语	老人	动物	固定形态	大楼	反光镜	粘液	磐石	沙粒	笑脸
17. CPB	女	19	水	地震	夏天	佛罗伊德	爱人	整容脸	收集者	钢铁	倪萍	叶子	天使	人	交流	器官	蚂蚁	远处的蛋糕	本科	病毒	宇宙	器官	婴儿	黄河的兄弟	故事	生命	春天的花	灵魂	小姐姐	明治	沙子	山路	力量	白纸	母亲	老鼠	意识	之字形	牌子	风	晚霞	泥	字符	方块	镜子	瘾	试金石	雾霾	梅花
18. CPB	女	18	美女	生命	生活	智者	符号	帅哥	建筑	手指	伟人	影子	人	伟人	冲突	耳朵	人	灯塔	大学	深渊	开放	好	天使	河	音乐	太阳	青年	未来	甜食	人	沙	泥土	人	狡辩	国	垃圾	想法	蛇	木板	春风	夕阳	人	遗传	成语	玻璃	拖延症	心	飞机	花
19. CPB	女	19	温柔的人	生活	漫长的时间	科学家	时间	梦想	安静的	树根	优秀的	凉爽的地方	万能人	科学家	生命	灵敏的器官	人类	遥不可及的事物	经历	可怕的东西	多变的东西	蛇	希望	巧克力	艺术	舒服的东西	志愿者	终点	君子	皇帝	生命	蛇	勇敢的	胡闹行为	母亲	噩梦	新奇	崎岖的	无处不在的东西	暖风	人生	动物	基因	单词	镜子	魔鬼	决心	浮沉	蝴蝶
20. CPB	女	18	好人	天使	天气	神秘人	谜题	咖啡	一个地方	麻花	奇才	长东西	圣人	伟大的	痛苦	甜食	地球	伟大的	必需品	违法行为	武器	未来	好的	河	灵魂	太阳	生命	未来	天才	皇帝	未来	长棍	厉害的人	耻辱	家	罪恶	未来	蛇	污染	春风	落日	猪	麻将	词语	玻璃	病毒	道	世事	草
21. CPB	女	21	奉献者	机遇	阶梯	医生	真理	孔雀	储藏处	枪	创造者	影子	医生	工程师	过程	失聪	破坏者	明灯	证明	利剑	观念	石头	传承者	河流	曲子	辐射	好人	重生	翻译	皇帝	陆地	通道	胖子	辩论	保护者	出轨	学习	羊肠小道	宣传	春风	日落	守护者	命令	小桥	镜子	慢性病	助推器	灰尘	脸庞
22. CPB	女	18	人	破产	中秋节	职业	数据	王子	地方	手指	人才	影子	职业	人才	矛盾	耳朵	人类	目标	本科	违法行为	精神食粮	蛇蝎心肠	未成年人	母亲河	传统音乐	资源	英雄	结果	英雄	统治者	地貌	弯路	职业	迷惑行为	中国	违法行为	创新	弯路	公物	欺骗	余晖	人	基因	海洋	镜子	毒药	利器	颗粒	喇叭
23. CPB	男	19	人	利	把	医生	生活	人	书	手指	艺术家	影子	医生	科学家	冲突	耳朵	坏蛋	屁	好	毒药	思想	石头	孩子	河	歌曲	光	人	归宿	高手	贵子	谈	路	人	唯心主义	家	罪孽	把	路	广告	幸福	太阳	人	基因	人	灯	毒药	石头	土	太阳
24. CPB	男	19	水	柠檬汁	流水	医生	阿拉伯数字	三观不正的人	生命	树枝	不可多得的人	投影	人才	资源	不可避免的	生活	高级动物	拼搏	大学	毒品	进步	热心肠	父母	落日	快乐	温暖	力量	一瞬间	精英	日本	沙	未来	天才	现实	花朵	神经病	路线	困难	吸引人的事物	深刻的道理	幸福	英雄	长链	知识	镜子	瘸子	弩箭	一缕青丝	草
25. CPB	女	18	人	痛苦	上课	朋友	悲伤	白敬亭	海洋	骨头	贝多芬	树的影子	医生	中国人	文化不同	未来	生活	财富	本科	乌克兰女性	真理	态度	别人	河	生命	太阳	雷锋	生活	很厉害的人	日本天皇	沙子	方向	蒙古人	诡异的辩论	中国	出轨	未来	数字	风筝	生活	落下的太阳	人	麻花	漂亮	彩虹	病	石块	灰	草
26. CPB	女	17	人类	危险	好日子	心理学家	数字	秦霄贤	图书馆	手指	名人	影子	医生	科学家	冲突	耳朵	人类	理想	本科	恶行	想法	她的心肠	孩子	河流	音乐	光线	青年	坟墓	工作	皇帝	沙子	捷径	参赛者	狡辩	祖国	恋情	思想	路	长方形	幸福	太阳	人类	片段	词语	水珠	拖延症	毅力	浮尘	月季
27. CPB	女	20	生物	危险	水	弗洛伊德	五	公民	老者	肉	天才	影子	医生	电脑	冲突	肉	高级动物	指引	门票	毒药	灯塔	善良	希望	大河	艺术	温暖	蜡烛	终止	破壁者	全力	沙子	人行道	力量	谎言	母亲	背叛	灯泡	路	宣传	清风	暮年	人类	链条	工具	镜子	砂糖橘	锁	飞虫	蛇
28. CPB	男	17	美人	现实	不能	弗洛伊德	经济	恶心的	知识	抱抱	疯子	脏的	人	科学家	争论	环境	动物	伟大的	本科	毒品	武器	善良	天使	大路	生命	高贵	真诚的人	不那	华哥	对错	高山	生命	力量	强词夺理	母亲	冲动的产物	未来	生活	教科书	未来	刚回家	刚好	链条	救急	水	狮子	生命	半年	湖南
29. CPB	女	19	人类	遭遇	生活	职业	雨天	失德艺人	建筑	铁制品	职业	影子	职业	职业	不可避免的事	器官	动物	有钱	学历证书	现象	虚无	善良的	可怕的人	风景	古典音乐	必需品	职业	归宿	职业	日本最高领袖	地貌	未来	职业	辩论	家	出轨	多样的人生	崎岖	媒介	力量	美景	人类	命令	表达方式	镜子	毒瘤	天方夜谭	扬沙	草
30. CPB	女	19	水	机遇	考级	教授	理性	帅哥	禁地	羊脂	大人物	影子	医生	理性	融合	器官	虫子	老师	通行证	喷子	星海	蛇蝎	宝宝	河	星星	光线	雷锋	解脱	人类	皇帝	快乐	胜利	胖子	技术	归属	偷腥	黄金	天梯	广告	阳光	阳光	猪	楼梯	花	镜子	癌症	钻石	灰尘	草
31. CPB	女	20	漂亮温柔的人	可怕的东西	岁月	神秘的事物	人生	财富	学习的	纤细的人	天才	鬼影	刀子	挖掘机	历史	事物	天使	伟大的事	门槛	可恨的人	人生	石头	妈妈的宝贝	落日	生命	温暖	奉献	梦魇	专家	权威	梦想	曲折	摔跤	噩梦	港湾	违法行为	梦想	曲折的路	浪费	温暖	慈祥老奶奶	坏人	基因	文字的孩子	鬼	魔鬼	石头	迷茫的生活	美女
32. CPB	女	19	水	镜子	梦想	算命人	计数	人才	生活	好看	照片	假的事物	帅哥	大国工匠	不好的现象	魅力	动物	镜子	必要的东西	坏蛋	牛奶	恶毒的东西	花朵	日子	舞蹈	电脑	太阳	终点	电脑	皇帝	镜子	生活	生活	有用的	家长	出轨	快乐	生活	电脑	人生	红的	保姆	图片	语文	影子	毒瘤	照片	图片	大家
33. CPB	女	19	美女	地震	丝带	彼得	生气的事	帅哥	建筑	木头	约翰	树	医生	我	水	耳朵	生物	旅游	本科	双刃剑	脑电波	好人	人	落日	音符	光	人	黑暗	工作者	人	沙子	水泥	职业	诡辩	妈妈	出轨	吃饭	路	纸	生活	太阳	人	生命	单词	镜子	树懒	磐石	尘埃	鸡蛋
34. CPB	女	19	美丽的我	必需品	好日子	专家	数据	腹肌男	建筑	削葱根	艺术	影子	医生	人才	冲突	美丽的耳朵	智慧	目标	研究生	坏事	精华	石头	新生	黄河	音符	希望	好人	终点	职业	权力	沙子	高速路	女生	辩论	母亲	谎言	观点	路	大牌子	问好	美景	支柱	螺旋体	语文	钻石	神经病	钢铁	尘埃	太阳
35. CPB	女	18	人	危险	好日子	医生	未来	牛人	书	手指	人	小鸟	神手	科学家	现象	耳朵	人	翻译	大学	杀人利剑	生命	热心肠	熊孩子	河	心灵钥匙	光	好人	危险	牛人	无语	海滩	高速路	勇士	辩论	母亲	无语	吃饭	路	商品	生命	晚霞	人	螺旋桨	词语	彩虹	病	磐石	扫把	玫瑰花
36. CPB	女	18	诗意	潜在风险	热烈	放松	雪花	帅哥	海洋	纤细	疯子	婆娑	白衣天使	大数据	痛苦	粉红	美好的人	钻石	必要	血腥	火花	柔软	天真	落日	旋律	热烈	奉献	夜晚	牛人	抗日战争	金黄	前方	肌肉	小丑	花园	讨厌	金子	回旋	消费	亲切	猩红	大猪蹄子	螺旋藻	贝壳	湖面	病	石头	精灵	孩子
37. CPB	女	19	明星	灾难	俄语	牛人	老师	秦霄贤	海洋	美玉	鲁迅	大树	神人	人才	书本	耳朵	财富	出国	研究生	刀子	财富	好人	宝贝	长江	心灵	太阳	好人	分别	神仙	大帝	沙子	家乡	爸爸	无耻	花朵	别人	财富	家乡	汽水	妈妈	余温	父亲	爸爸	智慧	光头	刀子	财富	大海	太阳
38. CPB	女	19	焰火	柠檬汁	西柚	葡萄	垃圾	仓库	废弃物	蹦迪	关键	鸡蛋	医生	桥梁	流水	废物	流星	云雾	高山	温泉	使者	大象	笨蛋	珊瑚	花朵	泉水	被子	轮回	动画	锅盔	流心蛋	夏季	斗士	地狱	花园	婚外情	音符	博士	废物	毒蝎	关键	冰雹	莲花	花朵	花椒	笔	宝石	朝霞	家乡
39. CPB	女	19	水	吉他	明天	药物	冒险	好人	远方	足球	职业	蒸汽	刀子	西伯利亚	意识流	由软骨组成的。	生物	冷面	万金油	眼泪	苇草	昨天	希望	象棋	河岸	水笔	沙丘	终点	工作人员	明星	乐园	数字	风	桌子	国家	玫瑰	钢琴	冰川	废物	良药	牛奶	人	风	工具一样。	湖面	时间	磐石	柠檬	树叶
40. CPB	男	18	人类	洪水	平静	神婆	号码	猥琐	大房子	木头	普通人	模糊	刀子	学者	矛盾	两个	主宰	遥远	垃圾	温柔	缥缈	歹毒	无辜	流水	灵魂伴侣	希望	免费	恐怖	翻译者	狗	沙子	大路	胖子	烈焰	伟大	约束	虚无	弯曲	大木框	未来	血红	大山	蛇	连接	水晶	幻像	利刃	叶子	人
41. CPB	女	18	温水	挑战	密码	刘梅	电话	爱豆	自习室	棍子	宇野赞多	画像	庄恕	张平	融合	顺风耳	虫	发财	刚需	混蛋	马克思主义	菩萨心肠	棉袄	历史	巴赫	春天	我	归宿	天使	日本天皇	夏威夷	金秋大道	她同学	阴天	中国	激情	永动机	十八弯	脑白金广告	关切	老年	垃圾	序列	花环	镜子	毒药	豆腐	人生	牡丹
42. CPB	女	19	春水	海啸	流水	巫师	符号	榜样	自习室	骨头	骗子	光斑	神仙	非人类	进步	漩涡	灵长类动物	大脑活动	个人证明	欺凌	意识	豆腐	未来	地形	声波	光线	天使	消散	怪物	象征	沙地	水泥	大力勇士	狡辩	后盾	垃圾	思维	泥地	招牌	春风	景色	雄性动物	葡萄	盒子	钻石	病	旗帜	蝌蚪	露水
43. CPB	女	18	人类	炸弹	生活	弗洛伊德	地球	神仙	学习	羽翼	职业	变化	勇士	科学家	政治	喇叭	建设者	未来的他	敲门砖	病毒	马克思主义	直路	天使	景观	享受	温暖	英雄	开始	高手	人	夏日	路	胖子	虚伪	母亲	出轨	惊喜	爬蛇	蛀虫	早安	黑夜	生物	锁链	树干	镜子	鸦片	旗杆	花朵	假花
44. CPB	女	20	幸福	机会	时间	医生	生命	帅哥	充电站	安静	宝藏	婆娑	心理学家	理工男	观念	一部分	蚂蚁	希望	基本要求	发泄	奇葩	器官	嫩芽	星星	美好	曙光	我们	终点	外交部	专制	美女	财富	运动员	历史	群体	内部	思想	画	公示	清晨	落日	性别	元素	先人	镜子	恶魔	牛	人生	宝贝
45. CPB	女	19	女人	危险	火花	医生	生活	爱豆	楼	尺	文化	影子	医者	打工人	冲突	白色的东西	入侵者	理想	专科	杀手	伟人	善良	未来	河	音率	晴朗	闲人	毁灭	忙人	天王老子	沙子	罗马路	人	倔强	国家	出轨	泉水	小路	广告	美女	红日	人	链条	语言	水	裹脚布	约定	雾	草
46. CPB	女	18	水	末日	盐巴	侦探	未知	帅哥	智者	枯树枝	艺术品	答案	手术刀	中国人	利器	收音机	哺乳动物	光	追求	弯刀	火花	铁石	小棉袄	堤坝	兴趣	保暖衣	小蜜蜂	河流	佼佼者	爸爸	保护伞	马路	女性	杀手	家	艳遇	灯泡	九曲回肠	正方形	彩虹	美景	动物	锁链	万能钥匙	刀	癞蛤蟆	试金石	浪花	散香
47. CPB	女	18	衣服	威胁	生活	读心者	无聊	卖国贼	园地	纤细	诗人	荫蔽	白领	天才	交融	肉	动物	彩虹	纸	拳头	芦苇	蛇蝎	老师	时间	风声	光粒子	勇者	通达	牛人	王	硅	天堑	运动员	技巧	母亲	监狱	虚无	十八弯	白象	眼药水	老人	生物	密码	花朵	眼睛	病	钢铁	蝼蚁	狮子
48. CPB	女	20	人	尖刺	零件	针尖	卫兵	扑克牌	基站	笋	自己	财富	城墙	计算器	拼图	创造之物	生物	吊灯	砖头	大海	触手	铁石	嫩芽	丝带	纯音乐	被子	蜡烛	灰烬	牵牛花	雾	怀抱	麻绳	女性	鱼钩	巨人	线头	灯泡	疤痕	外交人	盔甲	残血	人类	拉链	种子	灯	老牛	利刃	孩子	妇女
49. CPB	女	19	母亲	社会危机	曦光	职业	数词	人渣	公共文化单位	骨节	职业	指南针	临床医生	软件测试员	地域差异	精灵耳	动物	美好的	本科	社会问题	镜子	希望	小孩	长江	生命	向日葵	职业	长眠	翻译家	皇帝	蒸箱	马路	魏德曼	狡辩	中国	出轨	生活	马路	骗子	太阳	徬晚	男生	爸爸	小桥	月亮	老人	毅力	宦海	喇叭花
50. CPB	女	19	社会	恐慌	证明	共感的人	开心的事	星星	宇宙	支撑	作品	扮演家	艾米莉	精英	碰撞	世界的感受器	转瞬即逝的事	疫情	入场券	稻草	神奇的东西	春天	天使	起源	语言	好心情	传递者	契机	交流使者	日本人	邻居	见证者	力量	真理	依靠	抉择	画	沟通	宣传	微风	自然的画像	责任	共感	桥梁	大门	前兆	开始	疾病	精灵
[truncated: 73 more columns]
