# Supplementary material for: Normed dataset for novel metaphors, novel similes, literal and anomalous sentences in Chinese
Source: Front Psychol. 2022 Sep 1;13:922722. doi: 10.3389/fpsyg.2022.922722 (PMC9477117; doi:10.3389/fpsyg.2022.922722)
Supplement: Supplementary file 15 [file Data_Sheet_15.xlsx]

## Sheet: Metaphoricity_C
编号	1、性别	2、年龄	3、基因是鞋带	4、词语是陀螺	5、反光的玻璃是相册	6、拖延症是窃贼	7、决心是刺刀	8、浮尘是浪子	9、有的花是君子	10、短跑运动员是鱼雷	11、爱书者是赌徒	12、科学是冰川	13、机遇是钟声	14、自信是油门	15、有的女星是女皇	16、网络文化是零食	17、目录是纽扣	18、失败是蛋白质	19、脖子是方向盘	20、电视节目是麻醉剂	21、人生是香料	22、读者是猎手	23、作家是裁缝	24、舌头是密探	25、春天是解毒剂	26、血压是收藏家	27、和平是微风	28、知足是烈酒	29、历史是护身符	30、记忆是篱笆	31、技术是帮凶	32、秋天是渔夫	33、书籍是润滑油	34、太阳是发明家	35、静脉是长城	36、新的法律是过滤器	37、眼神是暴风雪	38、真理是爆炸物	39、大脑是手雷	40、月亮是蛋黄	41、有的国家是传教士	42、早晨是车头		43、忧伤像花朵	44、爱情像跳蚤	45、欲望像牙膏	46、大自然像屠夫	47、技术像拐杖	48、旋律像外衣
Participant Number	1. Gender	2. Age	3. Genes are shoelaces	4. Words are whipping tops	5.Reflective glass is an album	6.Procrastination is a burglar	7.Resolution is a bayonet	8. Dust is a prodigal	9.Some flowers are gentlemen	10.Short-distance runners are torpedoes	11.Book lovers are gamblers	12.Science is a glacier	13.Opportunity is a ring	14.Self-confidence is an accelerator	15.Some female stars are queens	16.Network culture is snacks	17.The catalogue is buttons	18.Failure is protein	19.Necks are steering reels	20.TV programmes are an anesthetic	21.Life is spice	22.Readers are hunters	23.Writers are tailors	24.Tongues are spies	25.Spring is an antidote	26.Blood pressure is a collector	27.Peace is a breeze	28.Contentment is liquor	29.History is an amulet	30.Memory is a hedge	31.Skills are accomplices	32.Autumn is a fisherman	33.Books are lubricating oil	34.The sun is an inventor	35.Veins are the Great Wall	36.The new law is a filter	37. One's look is a snowstorm	38.Truth is an explosive	39.The brain is an antitank grenade	40.The moon is an egg yolk	41.Some countries are missionaries	42.The morning is the headstock		43. Sorrow is like a flower	44. Love is like a flea	45. Desire is like a toothpaste	46. Nature is like a butcher	47. Technology is like a crutch	48. Melody is like an overcoat
1. MC	女	19	7	1	7	7	7	7	7	7	7	7	7	7	7	7	7	7	7	7	7	7	7	7	7	7	7	7	7	7	7	7	7	7	7	7	7	7	7	7	7	7		4	4	4	4	4	4
2. MC	女	20	2	1	4	5	2	4	5	2	2	4	6	2	3	3	4	6	4	4	4	4	5	2	4	6	5	5	3	5	2	7	2	6	5	4	4	2	4	2	6	5		3	4	5	2	4	5
3. MC	女	20	7	7	4	7	7	7	7	7	7	7	7	7	2	7	7	7	7	7	7	7	7	7	7	7	7	7	6	7	7	7	7	7	7	7	7	7	7	7	7	7		3	3	3	3	3	3
4. MC	女	19	7	7	7	7	7	7	7	7	7	7	7	7	7	7	6	7	7	7	7	7	7	7	7	7	7	7	7	7	7	7	7	7	7	7	7	7	7	7	7	7		7	6	7	7	7	6
5. MC	女	19	7	7	7	7	7	7	7	7	7	7	7	7	7	7	7	7	7	7	7	7	7	7	7	7	7	7	7	7	7	7	7	7	7	7	7	7	7	7	7	7		7	7	7	7	7	7
6. MC	女	20	7	6	4	6	7	6	6	6	4	6	6	6	6	6	6	6	6	6	6	7	6	6	6	6	6	6	7	6	4	6	6	6	6	6	7	6	6	4	6	7		7	6	6	4	6	5
7. MC	女	19	7	2	4	3	5	4	7	4	4	5	6	4	4	4	4	7	4	7	5	5	7	3	7	7	4	5	2	7	4	4	6	4	5	7	2	6	3	5	1	5		4	4	7	4	4	5
8. MC	女	18	5	4	4	1	4	4	4	4	6	6	4	6	2	4	4	6	4	6	4	4	4	3	4	5	4	6	5	5	5	5	5	5	3	4	4	5	5	6	4	4		4	4	5	6	5	4
9. MC	女	19	4	4	3	7	6	3	5	7	5	6	5	7	4	6	3	7	6	6	7	6	6	7	7	4	7	5	7	4	4	4	7	5	7	4	7	7	4	3	7	5		5	4	4	6	4	5
10. MC	女	19	6	4	6	7	6	7	5	6	5	7	4	6	5	6	7	7	4	6	4	6	7	5	5	6	6	7	7	6	7	6	5	6	6	4	7	7	7	5	6	7		6	5	4	5	6	6
11. MC	女	19	7	7	2	7	7	7	4	7	7	7	5	7	5	4	7	4	5	7	7	7	7	7	7	5	7	7	7	7	5	7	5	4	7	7	7	4	7	7	7	7		4	4	4	5	4	4
12. MC	女	20	4	5	3	7	7	7	4	7	5	7	7	7	4	5	5	6	5	7	5	7	5	7	7	7	7	7	7	6	5	7	7	6	7	4	3	7	7	6	4	7		6	7	3	6	5	4
13. MC	女	20	7	6	7	6	6	6	6	7	7	6	6	6	6	6	7	6	6	6	7	5	7	7	7	6	7	6	6	6	6	7	7	6	7	6	7	6	6	7	6	6		6	6	6	6	6	7
14. MC	女	20	4	4	4	4	5	5	4	7	4	7	7	7	7	7	7	4	6	4	7	7	7	5	5	5	7	7	7	4	7	5	7	7	4	4	7	7	7	7	4	7		6	5	6	4	4	6
15. MC	男	20	7	7	4	7	7	7	7	7	7	7	7	7	7	7	7	7	7	6	7	7	7	7	7	7	7	7	7	7	6	7	7	7	7	7	7	7	7	5	7	7		5	6	6	6	6	6
16. MC	女	19	5	6	5	6	6	5	5	7	5	6	6	6	3	6	5	7	7	6	6	7	7	6	6	7	6	6	7	7	6	6	7	6	6	6	6	7	7	6	7	6		4	4	4	4	4	4
17. MC	女	19	7	7	5	7	7	7	7	7	7	7	7	7	7	7	7	7	7	7	7	7	7	7	7	7	7	7	7	7	7	7	7	7	7	7	7	7	7	7	7	7		6	6	5	6	7	6
18. MC	男	18	5	6	5	6	5	5	1	5	5	5	5	7	6	5	5	7	5	5	6	5	7	5	6	6	5	7	5	5	5	7	7	6	5	5	6	5	7	3	5	5		6	6	5	5	5	5
19. MC	女	20	7	7	4	7	7	7	7	7	4	7	7	7	7	7	7	7	6	7	7	6	7	6	7	7	7	7	6	7	7	6	7	7	7	6	6	7	5	6	7	6		6	6	6	6	6	6
20. MC	女	19	7	6	4	6	4	5	7	5	3	7	6	5	4	6	4	7	4	3	7	7	3	2	5	7	3	6	6	4	5	6	6	4	4	6	5	4	7	5	6	6		5	3	6	6	7	6
[truncated: 74 more columns]
