# Supplementary material for: Normed dataset for novel metaphors, novel similes, literal and anomalous sentences in Chinese
Source: Front Psychol. 2022 Sep 1;13:922722. doi: 10.3389/fpsyg.2022.922722 (PMC9477117; doi:10.3389/fpsyg.2022.922722)
Supplement: Supplementary file 16 [file Table_1.xlsx]

## Sheet: Sheet1
编号	新奇隐喻	新奇明喻	本义句	无意义句
No.	Novel metaphors	Novel similes	Literal sentences	Anomalous sentences
1	忧伤是花朵	忧伤像花朵	桃花是花朵	鞋柜是花朵
2	爱情是跳蚤	爱情像跳蚤	这个昆虫是跳蚤	桌子是跳蚤
3	欲望是牙膏	欲望像牙膏	这种日用品是牙膏	泥坑是牙膏
4	大自然是屠夫	大自然像屠夫	老胡是屠夫	心脏是屠夫
5	技术是拐杖	技术像拐杖	这根棍子是拐杖	露水是拐杖
6	旋律是外衣	旋律像外衣	大衣是外衣	流星是外衣
7	年龄是闹钟	年龄像闹钟	这个钟是闹钟	茄子是闹钟
8	雪峰是王冠	雪峰像王冠	这顶帽子是王冠	充电器是王冠
9	长诗是洪水	长诗像洪水	这场灾害是洪水	那根木头是洪水
10	他的眼睛是大牢	他的眼睛像大牢	监狱是大牢	这袋洗衣粉是大牢
11	共鸣是兴奋剂	共鸣像兴奋剂	咖啡因是兴奋剂	瞌睡是兴奋剂
12	念头是向导	念头像向导	小蒋是向导	牙签是向导
13	人民是领土	人民像领土	领海是领土	失业是领土
14	承诺是甜品	承诺像甜品	蛋糕是甜品	黄连是甜品
15	作家是暴君	作家像暴君	这个皇帝是暴君	邮编是暴君
16	社会是快餐	社会像快餐	炸鸡是快餐	墨水是快餐
17	生活是海绵	生活像海绵	这种材料是海绵	钢铁是海绵
18	皮肤是盔甲	皮肤像盔甲	这种服装是盔甲	豆腐是盔甲
19	并蒂莲是配偶	并蒂莲像配偶	夫妻是配偶	气体是配偶
20	海水是摇篮	海水像摇篮	这种卧具是摇篮	壁虎是摇篮
21	忧愁是羊毛	忧愁像羊毛	这种面料是羊毛	这把香蕉是羊毛
22	意识形态是风筝	意识形态像风筝	这个玩具是风筝	台灯是风筝
23	痛苦是入场券	痛苦像入场券	门票是入场券	仙人掌是入场券
24	体香是蜜糖	体香像蜜糖	蜂蜜是蜜糖	火柴是蜜糖
25	她的目光是弹簧	她的目光像弹簧	这种零件是弹簧	硫酸是弹簧
26	友情是文物	友情像文物	故宫是文物	蛋挞是文物
27	文学是棋子	文学像棋子	这个道具是棋子	空气是棋子
28	天空是谜语	天空像谜语	隐语是谜语	肩膀是谜语
29	工作是合唱	工作像合唱	这首歌是合唱	防滑垫是合唱
30	这种诗人是害虫	这种诗人像害虫	这个虫子是害虫	胳膊是害虫
31	黑暗是高山	黑暗像高山	黄山是高山	隧道是高山
32	爬山虎是围墙	爬山虎像围墙	外墙是围墙	可口可乐是围墙
33	眼泪是肥料	眼泪像肥料	粪便是肥料	月球是肥料
34	生命是逃兵	生命像逃兵	那个人是逃兵	书包是逃兵
35	懒惰是高利贷	懒惰像高利贷	这种贷款是高利贷	太空是高利贷
36	时间是磁铁	时间像磁铁	这个物体是磁铁	白纸是磁铁
37	标点符号是信使	标点符号像信使	他的叔叔是信使	插座是信使
38	我的书桌是垃圾场	我的书桌像垃圾场	该处是垃圾场	彩虹是垃圾场
39	语言是温室	语言像温室	大棚是温室	地图是温室
40	灵感是乌云	灵感像乌云	黑云是乌云	白雪是乌云
41	女人是鸦片	女人像鸦片	这种毒品是鸦片	电线是鸦片
42	危机是传染病	危机像传染病	这种病是传染病	镜子是传染病
43	日子是火炉	日子像火炉	壁炉是火炉	冰窖是火炉
44	心理学家是拳击手	心理学家像拳击手	她的爸爸是拳击手	猕猴桃是拳击手
45	数字是锁链	数字像锁链	脚镣是锁链	油条是锁链
46	有些男星是吸尘器	有些男星像吸尘器	这个电器是吸尘器	针尖是吸尘器
47	图书馆是巢穴	图书馆像巢穴	鸟窝是巢穴	灭火器是巢穴
48	他的手指是猛禽	他的手指像猛禽	鹰是猛禽	玉米是猛禽
49	艺术家是羔羊	艺术家像羔羊	小羊是羔羊	雷声是羔羊
50	树影是长发	树影像长发	她的头发是长发	辣椒酱是长发
51	外科医生是木匠	外科医生像木匠	老陈是木匠	他的鼻孔是木匠
52	数据科学家是矿工	数据科学家像矿工	小王是矿工	护手霜是矿工
53	文化冲突是河流	文化冲突像河流	长江是河流	背包是河流
54	我的耳朵是赛场	我的耳朵像赛场	体育馆是赛场	冰淇淋是赛场
55	人类是手电筒	人类像手电筒	此物是手电筒	卷心菜是手电筒
56	梦想是岩浆	梦想像岩浆	这些物质是岩浆	这个猴子是岩浆
57	学历是雨伞	学历像雨伞	这把伞是雨伞	肥皂是雨伞
58	网络暴力是匕首	网络暴力像匕首	这个凶器是匕首	土豆是匕首
59	思想是金矿	思想像金矿	这个矿石是金矿	头皮屑是金矿
60	她的心肠是铁轨	她的心肠像铁轨	路轨是铁轨	花生是铁轨
61	孩子是胶水	孩子像胶水	这种产品是胶水	榨菜是胶水
62	长河是丝绸	长河像丝绸	这种纺织品是丝绸	这个葫芦是丝绸
63	音乐是蒸汽	音乐像蒸汽	这种气体是蒸汽	国旗是蒸汽
64	阳光是鞭子	阳光像鞭子	马鞭是鞭子	树叶是鞭子
65	志愿者是矿泉水	志愿者像矿泉水	这种水是矿泉水	他的足球是矿泉水
66	死亡是调料	死亡像调料	这种食材是调料	拖鞋是调料
67	同声传译员是天鹅	同声传译员像天鹅	这群鸟是天鹅	厕所是天鹅
68	天皇是吉祥物	天皇像吉祥物	熊猫是吉祥物	毒气是吉祥物
69	沙滩是软糖	沙滩像软糖	棉花糖是软糖	电钻是软糖
70	道路是吸管	道路像吸管	饮管是吸管	馒头是吸管
71	摔跤手是大猩猩	摔跤手像大猩猩	这个动物是大猩猩	豆浆是大猩猩
72	诡辩是剃刀	诡辩像剃刀	刮胡刀是剃刀	包子是剃刀
73	祖国是卫兵	祖国像卫兵	小刚是卫兵	芝麻酱是卫兵
74	婚外情是胡椒	婚外情像胡椒	这种果实是胡椒	钢琴是胡椒
75	想法是旋风	想法像旋风	气旋是旋风	沙发是旋风
76	山路是游乐场	山路像游乐场	迪士尼是游乐场	青菜是游乐场
77	广告牌是疤痕	广告牌像疤痕	痘坑是疤痕	凉皮是疤痕
78	她的问候是降落伞	她的问候像降落伞	这种装备是降落伞	洗手台是降落伞
79	夕阳是醉鬼	夕阳像醉鬼	老赵是醉鬼	卫生纸是醉鬼
80	男人是装饰品	男人像装饰品	项链是装饰品	尿液是装饰品
81	基因是鞋带	基因像鞋带	这根绳子是鞋带	番茄酱是鞋带
82	词语是陀螺	词语像陀螺	这个玩具是陀螺	饼干是陀螺
83	反光的玻璃是相册	反光的玻璃像相册	影集是相册	下水道是相册
84	拖延症是窃贼	拖延症像窃贼	小偷是窃贼	绿灯是窃贼
85	决心是刺刀	决心像刺刀	这种兵器是刺刀	面包是刺刀
86	浮尘是浪子	浮尘像浪子	阿强是浪子	牙齿是浪子
87	有的花是君子	有的花像君子	圣人是君子	钥匙是君子
88	短跑运动员是鱼雷	短跑运动员像鱼雷	这种武器是鱼雷	油漆是鱼雷
89	爱书者是赌徒	爱书者像赌徒	老刘是赌徒	眼药水是赌徒
90	科学是冰川	科学像冰川	冰河是冰川	热水是冰川
91	机遇是钟声	机遇像钟声	这种声音是钟声	打火机是钟声
92	自信是油门	自信像油门	这个装置是油门	地板是油门
93	有的女星是女皇	有的女星像女皇	这个女人是女皇	呼吸是女皇
94	网络文化是零食	网络文化像零食	瓜子是零食	砖头是零食
95	目录是纽扣	目录像纽扣	扣子是纽扣	大炮是纽扣
96	失败是蛋白质	失败像蛋白质	这种成分是蛋白质	办公室是蛋白质
97	脖子是方向盘	脖子像方向盘	舵是方向盘	水泥是方向盘
98	电视节目是麻醉剂	电视节目像麻醉剂	这类药是麻醉剂	杯子是麻醉剂
99	人生是香料	人生像香料	姜是香料	螺丝刀是香料
100	读者是猎手	读者像猎手	这些人是猎手	胡萝卜是猎手
101	作家是裁缝	作家像裁缝	他的奶奶是裁缝	手表是裁缝
102	舌头是密探	舌头像密探	间谍是密探	橙子是密探
103	春天是解毒剂	春天像解毒剂	这种药是解毒剂	农药是解毒剂
104	血压是收藏家	血压像收藏家	老范是收藏家	汽油是收藏家
105	和平是微风	和平像微风	轻风是微风	火箭是微风
106	知足是烈酒	知足像烈酒	白酒是烈酒	空调是烈酒
107	历史是护身符	历史像护身符	那个物件是护身符	大象是护身符
108	记忆是篱笆	记忆像篱笆	这个栅栏是篱笆	火腿肠是篱笆
109	技术是帮凶	技术像帮凶	同伙是帮凶	和平鸽是帮凶
110	秋天是渔夫	秋天像渔夫	老李是渔夫	钢笔是渔夫
111	书籍是润滑油	书籍像润滑油	机油是润滑油	脸盆是润滑油
112	太阳是发明家	太阳像发明家	老张是发明家	骨头是发明家
113	静脉是长城	静脉像长城	这个古迹是长城	鼻子是长城
114	新的法律是过滤器	新的法律像过滤器	这个设备是过滤器	大豆是过滤器
115	眼神是暴风雪	眼神像暴风雪	这种天气是暴风雪	椅子是暴风雪
116	真理是爆炸物	真理像爆炸物	火药是爆炸物	白云是爆炸物
117	大脑是手雷	大脑像手雷	手榴弹是手雷	兔子是手雷
118	月亮是蛋黄	月亮像蛋黄	这种食物是蛋黄	石头是蛋黄
119	有的国家是传教士	有的国家像传教士	这个人是传教士	尸体是传教士
120	早晨是车头	早晨像车头	这个地方是车头	大米是车头
